# Supplementary material for: Assessment of the Implementation of Pharmacogenomic Testing in a Pediatric Tertiary Care Setting
Source: PubMed Central journal article supplement (PMC8155824; doi:10.1001/jamanetworkopen.2021.10446), 2021-05-26
Supplement: jamanetwopen-e2110446-s001.pdf [file jamanetwopen-e2110446-s001.pdf]

## Supplementary Online Content

Cohn I, Manshaei R, Liston E, et al. Assessment of the implementation of pharmacogenomic testing in a pediatric tertiary care setting. *JAMA Netw Open*. 2021;4(5):e2110446. doi:10.1001/jamanetworkopen.2021.10446

**eTable.** Patient Data by Study Group for Children With Past, Current, and Imminent Drug Therapy

This supplementary material has been provided by the authors to give readers additional information about their work.

**eTable.** Patient Data by Study Group for Children With Past, Current, and Imminent Drug Therapy

| Patient | Number of inquired genes (reactive)       | Number of inquired genes (pre-emptive)                 | Inquired drugs                        | PGx test reason                                                                             | PGx use                   |
|---------|-------------------------------------------|--------------------------------------------------------|---------------------------------------|---------------------------------------------------------------------------------------------|---------------------------|
| CC1     | 2: CYP2C9 (IM), CYP2C19 (IM)              | 0                                                      | (cannabinoids), ibuprofen, omeprazole | partial response to PPI use                                                                 | current/past drug therapy |
| CC2     | 0                                         | 1: CYP2C9 (IM)                                         | not on PGx drugs                      | experienced severe hypersensitivity reaction on carbamazepine; use of other anticonvulsants | imminent drug therapy     |
| CC3     | 0                                         | 1: TPMT (NM)                                           | not on PGx drugs                      | planned use of azathioprine                                                                 | imminent drug therapy     |
| CC4     | 0                                         | 3: CYP2C9 (IM), VKORC1 (normal function), CYP2C19 (NM) | not on PGx drugs                      | WES sequencing; PGx validation- congenital heart disease                                    | imminent drug therapy     |
| CC5     | 1: CYP2C19 NM                             | 0                                                      | rabeprazole                           | unsuccessful PPI use                                                                        | current/past drug therapy |
| CC6     | 0                                         | 1: CYP2C9 (IM)                                         | not on PGx drugs                      | planned anticonvulsant therapy                                                              | imminent drug therapy     |
| CC7     | 1: CYP2C19 IM                             | 0                                                      | omeprazole                            | unsuccessful PPI use                                                                        | current/past drug therapy |
| CC8     | 0                                         | 1: CYP2C9 (IM)                                         | not on PGx drugs                      | experienced hypersensitivity reaction on carbamazepine; use of other anticonvulsants        | imminent drug therapy     |
| CC9     | 0                                         | 1: CYP2C9 (NM)                                         | not on PGx drugs                      | experienced hypersensitivity reaction on carbamazepine; use of other anticonvulsants        | imminent drug therapy     |
| CC10    | 1: CYP2C19 (IM)                           | 0                                                      | rabeprazole                           | partial response on high doses of PPI's                                                     | current/past drug therapy |
| CC11    | 3: CYP3A5 (IM), CYP2D6 (NM), CYP2C19 (NM) | 0                                                      | flecainide, omeprazole, tacrolimus    | cardiac transplant recipient; difficulties achieving optimal dosing with tacrolimus         | current/past drug therapy |

|      |                                           |                                                                     |                                  |                                                                                                                         |                                                   |
|------|-------------------------------------------|---------------------------------------------------------------------|----------------------------------|-------------------------------------------------------------------------------------------------------------------------|---------------------------------------------------|
| CC12 | 0                                         | 2: CYP2C19 (PM), CYP2D6 (NM)                                        | oxcarbazepine                    | planned SSRI/ psychopharmaca use                                                                                        | imminent drug therapy                             |
| CC13 | 0                                         | 1: CYP2C9 (NM)                                                      | not on PGx drugs                 | experienced hypersensitivity reaction on carbamazepine; use of other anticonvulsants (at the time we tested HLA-A*3101) | imminent drug therapy                             |
| CC14 | 2: CYP2C19 (PM), CYP2D6 (NM)              | 0                                                                   | ondansetron, pantoprazole        | partial response on high doses of PPI's                                                                                 | current/past drug therapy                         |
| CC15 | 0                                         | 1: CYP2D6 (UM)                                                      | not on PGx drugs                 | Antley- Bixler syndrome- CYP2D6 status                                                                                  | imminent drug therapy                             |
| CC16 | 0                                         | 1: CYP2C9 (NM)                                                      | not on PGx drugs                 | experienced hypersensitivity reaction on carbamazepine; use of other anticonvulsants                                    | imminent drug therapy                             |
| CC17 | 3: CYP2C9 (PM), CYP2C19 (NM), CYP2D6 (NM) | 0                                                                   | naproxen, sertraline             | serotonin syndrome while on SSRI's (fluoxetine, sertraline)                                                             | current/past drug therapy                         |
| CC18 | 1: CYP2C19 (NM)                           | 4: CYP3A5 (PM), CYP2D6 (NM), CYP2C9 (NM), VKORC1 (reduced function) | clopidogrel, lansoprazole        | cardiac transplant candidate; may be given ondansetron, tacrolimus, warfarin                                            | imminent drug therapy + current/past drug therapy |
| CC19 | 2: CYP2C19 (IM), CYP2D6 (NM)              | 3: CYP3A5 (PM), CYP2C9 (NM), VKORC1 (reduced function)              | metoprolol, omeprazole           | cardiac transplant candidate; may be given clopidogrel, ondansetron, tacrolimus, warfarin                               | imminent drug therapy + current/past drug therapy |
| CC20 | 2: CYP2C19 (IM), CYP2D6 (NM)              | 3: CYP3A5 (PM), CYP2C9 (IM), VKORC1 (reduced function)              | diazepam, metoprolol, omeprazole | cardiac transplant candidate; may be given clopidogrel, ondansetron, tacrolimus, warfarin                               | imminent drug therapy + current/past drug therapy |
| CC21 | 2: CYP2C19 (IM), CYP3A5 (PM)              | 0                                                                   | lansoprazole, tacrolimus         | cardiac transplant recipient; experienced GI bleed and thrombotic event on pantoprazole, clopidogrel                    | current/past drug therapy                         |

|      |                              |                              |                                                       |                                                                                             |                                                   |
|------|------------------------------|------------------------------|-------------------------------------------------------|---------------------------------------------------------------------------------------------|---------------------------------------------------|
| CC22 | 1: CYP2C19 (NM)              | 0                            | omeprazole                                            | unsuccessful PPI use (omeprazole)                                                           | current/past drug therapy                         |
| CC23 | 1: CYP2C19 (NM)              | 0                            | omeprazole                                            | unsuccessful PPI use (omeprazole)                                                           | current/past drug therapy                         |
| CC24 | 2: CYP2D6 (NM), CYP2C19 (NM) | 0                            | aripiprazole                                          | partial response to SSRI (sertraline)                                                       | current/past drug therapy                         |
| CC25 | 0                            | 1: CYP2C9 (NM)               | oxcarbazepine                                         | experienced severe hypersensitivity reaction on carbamazepine; use of other anticonvulsants | imminent drug therapy                             |
| CC26 | 1: CYP2C19 (NM)              | 0                            | omeprazole                                            | non responsive to PPI use                                                                   | current/past drug therapy                         |
| CC27 | 0                            | 2: CYP2D6 (NM), CYP2C19 (NM) | not on PGx drugs                                      | planned SSRI/psychopharmaca use                                                             | imminent drug therapy                             |
| CC28 | 2: CYP2C19 (NM), CYP2D6 (IM) | 0                            | none                                                  | nose bleeds while on paroxetine                                                             | current/past drug therapy                         |
| CC29 | 0                            | 2: CYP2D6 (NM), CYP2C19 (IM) | none                                                  | planned SSRI/psychopharmaca use                                                             | imminent drug therapy                             |
| CC30 | 1: CYP2C19 (IM)              | 0                            | pantoprazole                                          | unsuccessful PPI use                                                                        | current/past drug therapy                         |
| CC31 | 2: CYP2D6 (NM), CYP2C19 (NM) | 2: CYP2D6 (NM), CYP2C19 (NM) | not on PGx drugs                                      | non response to SSRI/psychopharmaca                                                         | imminent drug therapy + current/past drug therapy |
| CC32 | 2: CYP2D6 (NM), CYP2C19 (IM) | 0                            | clopidogrel, metoprolol                               | thrombotic events, started on clopidogrel                                                   | current/past drug therapy                         |
| CC33 | 1: CYP2D6 (IM)               | 1: CYP2C19 (IM)              | risperidone                                           | partial response to SSRI/ future use of SSRI                                                | imminent drug therapy + current/past drug therapy |
| CC34 | 2: CYP2D6 (NM), CYP2C19 (IM) | 0                            | risperidone, sertraline                               | partial response to SSRI                                                                    | current/past drug therapy                         |
| CC35 | 2: CYP2D6 (NM), CYP2C19 (NM) | 0                            | amitriptyline, ondansetron, pantoprazole, risperidone | unsuccessful PPI use                                                                        | current/past drug therapy                         |
| CC36 | 1: CYP2C9 (NM)               | 1: CYP2C9 (NM)               | not on PGx drugs                                      | behavioral changes to antiepileptics                                                        | imminent drug therapy +                           |

|      |                                                                      |                                           |                                     |                                                                                 |                                                   |
|------|----------------------------------------------------------------------|-------------------------------------------|-------------------------------------|---------------------------------------------------------------------------------|---------------------------------------------------|
|      |                                                                      |                                           |                                     |                                                                                 | current/past drug therapy                         |
| CC37 | 2: CYP2D6 (NM), CYP2C19 (NM)                                         | 0                                         | fluvoxamine                         | unresponsive to SSRI                                                            | current/past drug therapy                         |
| CC38 | 1: CYP2C19 (IM)                                                      | 0                                         | escitalopram                        | excessive weight gain with escitalopram                                         | current/past drug therapy                         |
| CC39 | 2: CYP2C19 (PM), CYP2D6 (NM)                                         | 0                                         | clopidogrel, ondansetron            | cerebellar thrombotic events while on clopidogrel                               | current/past drug therapy                         |
| CC40 | 4: CYP2C19 (NM), CYP2D6 (IM), CYP2C9 (NM), VKORC1 (reduced function) | 2: CYP2C19 (NM), CYP3A5 (PM)              | lansoprazole, ondansetron, warfarin | cardiac transplant candidate; may be given clopidogrel and tacrolimus           | imminent drug therapy + current/past drug therapy |
| CC41 | 1: CYP2D6 (IM)                                                       | 2: CYP2C19 (IM), CYP2D6 (IM)              | aripiprazole, fluvoxamine           | partial response to SSRI/ psychopharmaca                                        | imminent drug therapy + current/past drug therapy |
| CC42 | 1: CYP2C19 (NM)                                                      | 2: CYP2C19 (NM), CYP2D6 (NM)              | sertraline                          | partial responsive to SSRI                                                      | imminent drug therapy + current/past drug therapy |
| CC43 | 4: CYP2C19 (NM), CYP2D6 (NM), CYP2C9 (NM), VKORC1 (normal function)  | 3: CYP2C19 (NM), CYP3A5 (IM), CYP2D6 (NM) | warfarin, lansoprazole, ibuprofen   | cardiac transplant candidate; may be given clopidogrel, ondansetron, tacrolimus | imminent drug therapy + current/past drug therapy |
| CC44 | 0                                                                    | 2: CYP2C19 (RM), CYP2D6 (NM)              | not on PGx drugs                    | planned SSRI/ psychopharmaca use                                                | imminent drug therapy                             |
| CC45 | 3: CYP2D6 (NM), CYP2C9 (NM), VKORC1 (normal function)                | 2: CYP2C19 (IM), CYP3A5 (PM)              | ondansetron, warfarin               | cardiac transplant candidate; may be given clopidogrel, tacrolimus              | imminent drug therapy + current/past drug therapy |

|       |                              |                                                                                  |                            |                                                                                           |                                                   |
|-------|------------------------------|----------------------------------------------------------------------------------|----------------------------|-------------------------------------------------------------------------------------------|---------------------------------------------------|
| CC46  | 2: CYP2C9 (IM), CYP2C19 (NM) | 2: CYP2D6 (NM), CYP2C19 (NM)                                                     | lansoprazole, naproxen     | planned SSRI/psychopharmaca use                                                           | imminent drug therapy + current/past drug therapy |
| CC47  | 1: CYP2D6 (NM)               | 2: TPMT (NM), CYP3A5 (IM)                                                        | metoprolol                 | planned use of azathioprine, tacrolimus                                                   | imminent drug therapy + current/past drug therapy |
| CC48  | 1: CYP2C19 (IM)              | 1: CYP2C19 (IM)                                                                  | lansoprazole               | portal vein thrombosis; imminent clopidogrel use                                          | imminent drug therapy + current/past drug therapy |
| CC49  | 1: CYP2C19 (NM)              | 0                                                                                | diazepam, pantoprazole     | unsuccessful PPI use                                                                      | current/past drug therapy                         |
| CC50  | 1: CYP2C19 (IM)              | 4: CYP2D6 (UM), CYP2C9 (NM), CYP3A5 (PM), VKORC1 (normal function)               | clopidogrel                | cardiac transplant candidate; may be given tacrolimus, warfarin, ondansetron              | imminent drug therapy + current/past drug therapy |
| CC51  | 0                            | 5: CYP2D6 (NM), CYP2C19 (NM), CYP2C9 (NM), CYP3A5 (PM), VKORC1 (normal function) | none                       | cardiac transplant candidate; may be given clopidogrel, ondansetron, tacrolimus, warfarin | imminent drug therapy                             |
| CC52  | 0                            | 2: CYP2C19 (PM), CYP2D6 (IM)                                                     | none                       | planned SSRI/psychopharmaca use                                                           | imminent drug therapy                             |
| CC53  | 1: CYP2C19 (NM)              | 0                                                                                | omeprazole                 | unsuccessful PPI use-dose adjusted back to normal range                                   | current/past drug therapy                         |
| CC54  | 2: CYP2C19 (RM), CYP2D6 (IM) | 0                                                                                | rabeprazole, tetrabenazine | unsuccessful PPI use                                                                      | current/past drug therapy                         |
| CC55  | 0                            | 2: CYP2C19 (RM), CYP2D6 (NM)                                                     | not on PGx drugs           | planned SSRI/psychopharmaca use                                                           | imminent drug therapy                             |
| CC56  | 0                            | 2: CYP2D6 (NM), CYP2C19 (NM)                                                     | not on PGx drugs           | planned SSRI/psychopharmaca use                                                           | imminent drug therapy                             |
| CC57  | 1: CYP2C19 (IM)              | 0                                                                                | clopidogrel                | started on clopidogrel; experienced 2nd stroke                                            | current/past drug therapy                         |
| CGC11 | 1: CYP3A5 (NM)               | 0                                                                                | tacrolimus                 | cardiac transplant recipient; difficulties achieving optimal dosing with tacrolimus       | current/past drug therapy                         |
| CGC15 | 1: CYP2C19 (RM)              | 0                                                                                | clopidogrel                | cardiac disease                                                                           | current/past drug therapy                         |

|       |                                           |                                                                                  |                                         |                                                                                                |                                                   |
|-------|-------------------------------------------|----------------------------------------------------------------------------------|-----------------------------------------|------------------------------------------------------------------------------------------------|---------------------------------------------------|
| CGC17 | 2: CYP2C9 (NM), VKORC1 (normal function)  | 0                                                                                | warfarin                                | cardiac disease                                                                                | current/past drug therapy                         |
| CGC19 | 2: CYP2D6 (IM), CYP2C19 (IM)              | 0                                                                                | aripiprazole, atomoxetine, lansoprazole | cardiac disease                                                                                | current/past drug therapy                         |
| CGC20 | 2: CYP2C19 (RM), CYP2C9 (NM)              | 0                                                                                | clopidogrel, ibuprofen, omeprazole      | non responsive to PPI use                                                                      | current/past drug therapy                         |
| CGC30 | 1: CYP2C19 (NM)                           | 2: CYP2C9 (IM), VKORC1 (reduced function)                                        | lansoprazole                            | planned warfarin therapy                                                                       | imminent drug therapy + current/past drug therapy |
| CGC31 | 1: CYP2C19 (RM)                           | 0                                                                                | none                                    | partial response to omeprazole                                                                 | current/past drug therapy                         |
| CGC34 | 1: CYP2C19 (RM)                           | 1: CYP2C19 (RM)                                                                  | omeprazole                              | planned to receive clopidogrel, but will be changed to aspirin                                 | imminent drug therapy + current/past drug therapy |
| CGC35 | 1: CYP2C19 (UM)                           | 0                                                                                | clopidogrel                             | experienced bleeding incident on clopidogrel                                                   | current/past drug therapy                         |
| CGC38 | 2: CYP2C9 (IM), VKORC1 (reduced function) | 0                                                                                | warfarin                                | cardiac disease                                                                                | current/past drug therapy                         |
| CGC43 | 1: CYP2C19 (IM)                           | 0                                                                                | omeprazole                              | cardiac disease                                                                                | current/past drug therapy                         |
| CGC44 | 1: CYP2C19 (RM)                           | 0                                                                                | none                                    | unresponsive to PPI use                                                                        | current/past drug therapy                         |
| CGC45 | 0                                         | 5: CYP2C19 (PM), CYP2C9 (NM), CYP2D6 (NM), CYP3A5 (IM), VKORC1 (normal function) | not on PGx drugs                        | cardiac disease and liver disease; may be given clopidogrel, ondansetron, tacrolimus, warfarin | imminent drug therapy                             |
| CGC46 | 1: CYP3A5 (IM)                            | 0                                                                                | tacrolimus                              | cardiac transplant recipient; difficulties achieving optimal dosing with tacrolimus            | current/past drug therapy                         |

|       |                                          |                                                         |                  |                                                                       |                                                   |
|-------|------------------------------------------|---------------------------------------------------------|------------------|-----------------------------------------------------------------------|---------------------------------------------------|
| CGC50 | 2: CYP2C9 (IM), VKORC1 (poor function)   | 1: CYP2C19 (UM)                                         | not on PGx drugs | cardiac disease; may be given clopidogrel, was on warfarin perviously | imminent drug therapy + current/past drug therapy |
| CGC53 | 1: CYP2C19 (RM)                          | 0                                                       | lansoprazole     | partial response to lansoprazole                                      | current/past drug therapy                         |
| CGC54 | 1: VKORC1 (poor function)                | 0                                                       | warfarin         | INR tends to become suprathapeutic                                    | current/past drug therapy                         |
| CGC55 | 0                                        | 3: CYP2C19 (NM), CYP2C9 (IM), VKORC1 (poor function)    | not on PGx drugs | cardiac disease; may be given clopidogrel, warfarin                   | imminent drug therapy                             |
| CGC56 | 1: VKORC1 (poor function)                | 0                                                       | not on PGx drugs | warfarin use in the past; difficulties adjusting doses                | current/past drug therapy                         |
| CGC57 | 1: CYP2D6 (UM)                           | 0                                                       | none             | side effects while on codeine (difficulties waking up)                | current/past drug therapy                         |
| CGC59 | 1: CYP2D6 (UM)                           | 0                                                       | not on PGx drugs | partial response to ondansetron                                       | current/past drug therapy                         |
| CGC62 | 0                                        | 3: CYP2C19 (IM), CYP2C9 (NM), VKORC1 (poor function)    | none             | cardiac disease; may be given clopidogrel, warfarin                   | imminent drug therapy                             |
| CGC65 | 2: CYP2C9 (PM), VKORC1 (poor function)   | 0                                                       | warfarin         | suprathapeutic INR 8 at the beginning of therapy                      | current/past drug therapy                         |
| CGC68 | 0                                        | 3: CYP2C19 (IM), CYP2C9 (NM), VKORC1 (reduced function) | not on PGx drugs | cardiac disease; may be given clopidogrel, warfarin                   | imminent drug therapy                             |
| CGC69 | 1: CYP2C19 (RM)                          | 0                                                       | not on PGx drugs | unresponsive to PPI use                                               | current/past drug therapy                         |
| CGC70 | 0                                        | 3: CYP2C19 (IM), CYP2C9 (NM), VKORC1 (normal function)  | not on PGx drugs | cardiac disease; may be given clopidogrel, warfarin                   | imminent drug therapy                             |
| CGC72 | 2: CYP2C9 (NM), VKORC1 (normal function) | 1: CYP2C19 (IM)                                         | warfarin         | congenital heart disease; hx of anticoagulation, GERD                 | imminent drug therapy + current/past drug therapy |
| CGC74 | 1: CYP2C9 (IM)                           | 0                                                       | ibuprofen        | cardiac disease                                                       | current/past drug therapy                         |



|        |                                                        |                                                         |                      |                                                     |                           |
|--------|--------------------------------------------------------|---------------------------------------------------------|----------------------|-----------------------------------------------------|---------------------------|
| CGC76  | 0                                                      | 2: CYP2C9 (PM), VKORC1 (reduced function)               | not on PGx drugs     | may be given warfarin in the near future            | imminent drug therapy     |
| CGC80  | 1: CYP2C19 (RM)                                        | 0                                                       | not on PGx drugs     | unresponsive to PPI (lansoprazole) use              | current/past drug therapy |
| CGC90  | 1: CYP2C19 NM                                          | 0                                                       | lansoprazole         | cardiac disease                                     | current/past drug therapy |
| CGC93  | 0                                                      | 3: CYP2C19 (NM), CYP2C9 (NM), VKORC1 (poor function)    | not on PGx drugs     | cardiac disease; may be given clopidogrel, warfarin | imminent drug therapy     |
| CGG94  | 2: CYP2C9 (NM), VKORC1 (normal function)               | 0                                                       | warfarin             | cardiac disease                                     | current/past drug therapy |
| CGC95  | 1: CYP2C19 (RM)                                        | 0                                                       | none                 | unresponsive to PPI (omeprazole) use                | current/past drug therapy |
| CGC100 | 0                                                      | 3: CYP2C19 (NM), CYP2C9 (NM), VKORC1 (reduced function) | not on PGx drugs     | cardiac disease; may be given clopidogrel, warfarin | imminent drug therapy     |
| CGC109 | 3: CYP2D6 (NM), CYP2C9 (NM), VKORC1 (reduced function) | 1: CYP2C19 (RM)                                         | flecainide, warfarin | cardiac disease                                     | current/past drug therapy |
| CGC111 | 1: CYP2C19 (RM)                                        | 0                                                       | omeprazole           | cardiac disease                                     | current/past drug therapy |
| CGC112 | 1: CYP2C9 (IM)                                         | 0                                                       | ibuprofen            | cardiac disease                                     | current/past drug therapy |

Abbreviations: CC, consultation cohort; CGC, cardiac genome clinic; IM, intermediate metabolizer; NM, normal metabolizer; PM, poor metabolizer; RM, rapid metabolizer; UM, ultrarapid metabolizer
